# Supplementary material
Source: HighWire-hosted journal article supplement (https://jnm.snmjournals.org/highwire/filestream/95385/field_highwire_adjunct_files/0/212514_Supplemental_Data.pdf)

**SUPPLEMENTAL TABLE 1.** 11C-MET-PET scan frequency and timing

| <b>Time Point</b> | <b>No. of 11C-MET-PET Scans</b> | <b>No. (%) of Positive 11C-MET-PET Scans</b> |
|-------------------|---------------------------------|----------------------------------------------|
| Diagnosis         | 22                              | 18 (82%)                                     |
| Surveillance 1    | 17                              | 15 (88%)                                     |
| Surveillance 2    | 3                               | 3 (100%)                                     |
| Surveillance 3    | 1                               | 1 (100%)                                     |
| Total             | 43                              | 37 (86%)                                     |

  

| <b>MRI and 11C-MET-PET Interval</b> | <b>Median (days)</b> | <b>IQR (days)</b> |
|-------------------------------------|----------------------|-------------------|
| Diagnosis                           | 6.0                  | 4.0–7.8           |
| Surveillance 1                      | 1.0                  | 1.0–5.0           |

  

| <b>Surveillance 1 Interval (N = 12)</b> | <b>Median (days)</b> | <b>IQR (days)</b> |
|-----------------------------------------|----------------------|-------------------|
| End RT to Surveillance 1 PET            | 32.5                 | 23.8–41.0         |

RT, radiation therapy

**SUPPLEMENTAL TABLE 2:** Patient, treatment, and outcome characteristics.

| Characteristic                    |            | N  | % or Median (IQR)         |
|-----------------------------------|------------|----|---------------------------|
| Age @ RT                          |            | 22 | 9.3 y (6.8–13.5 y)        |
| Sex                               | Male       | 11 | 50.0%                     |
|                                   | Female     | 11 | 50.0%                     |
| Race                              | Black      | 3  | 13.6%                     |
|                                   | White      | 19 | 86.4%                     |
| Biopsy                            | No         | 15 | 68.2%                     |
|                                   | Yes        | 7  | 31.8%                     |
| Radiotherapy                      | No         | 0  | 0%                        |
|                                   | Yes        | 22 | 100%                      |
|                                   | Total dose | 22 | 54 Gy (range, 54–55.8 Gy) |
| Concurrent chemotherapy-RT        | No         | 4  | 18.2%                     |
|                                   | Yes        | 18 | 81.8%                     |
| Adjuvant-only chemotherapy        | No         | 20 | 90.9%                     |
|                                   | Yes        | 2  | 9.1%                      |
| Progression*                      | No         | 1  | 4.8%                      |
|                                   | Yes        | 20 | 95.2%                     |
| Time from RT start to progression | Months     | 20 | 8.6 (5.2–10.6)            |
| Death*                            | No         | 3  | 14.3%                     |
|                                   | Yes        | 18 | 85.7%                     |
| Time from RT start to death       | Months     | 18 | 13.7 (7.7–21.4)           |

IQR, interquartile range; RT, radiation therapy; \*one patient lost to follow-up

**SUPPLEMENTAL TABLE 3.** Selected baseline imaging and clinicopathologic study characteristics.

| Patient | Age (y) | Sex    | Clinical Dx | MRI +Gd | 11C-MET-PET Intensity | 11C-MET-PET Uniformity | Path Dx, WHO grade | Tissue Source | Failure Type | PFS (mo) | OS (mo) | Vital Status |
|---------|---------|--------|-------------|---------|-----------------------|------------------------|--------------------|---------------|--------------|----------|---------|--------------|
| 1       | 10      | Female | DIPG        | No      | 2 (Negative)          | NA                     | GBM, IV            | Autopsy       | Distant      | 10.1     | 11.1    | DOD          |
| 2       | 5       | Female | A-DIPG      | No      | 3                     | 1                      | NA                 | NA            | Local        | 1.3      | 2.2     | DOD          |
| 3       | 14      | Female | DIPG        | No      | 2 (Negative)          | NA                     | NA                 | NA            | Local        | 8.9      | 17.4    | DOD          |
| 4       | 2       | Male   | DIPG        | Yes     | 3                     | 1                      | NA                 | NA            | Local        | 15.0     | 19.3    | DOD          |
| 5       | 13      | Male   | DIPG        | No      | 3                     | 1                      | NA                 | NA            | Local        | 5.3      | 7.5     | DOD          |
| 6       | 15      | Male   | A-DIPG      | No      | 3                     | 1                      | AA, III            | Biopsy        | Local        | 4.8      | 7.5     | DOD          |
| 7       | 9       | Female | DIPG        | Yes     | 3                     | 2                      | NA                 | NA            | Local        | 4.7      | 12.5    | DOD          |
| 8       | 13      | Male   | A-DIPG      | Yes     | 3                     | 1                      | HGG, NOS           | Biopsy        | Local        | 20.9     | 27.3    | DOD          |
| 9       | 8       | Male   | A-DIPG      | No      | 3                     | 1                      | DA, II             | Biopsy        | None         | NA       | NA      | AWOD         |
| 10      | 16      | Female | A-DIPG      | No      | 3                     | 2                      | DA, II             | Biopsy        | Local        | 50.7     | 59.1    | DOD          |
| 11      | 17      | Female | DIPG        | No      | 3                     | 1                      | GBM, IV            | Spine Met     | Distant      | 9.2      | 35.8    | DOD          |
| 12      | 8       | Female | DIPG        | Yes     | 3                     | 3                      | NA                 | NA            | Local        | 4.6      | 8.0     | DOD          |
| 13      | 7       | Male   | DIPG        | No      | 2 (Negative)          | NA                     | GBM, IV            | Autopsy       | Local        | 6.1      | 6.2     | DOD          |
| 14      | 2       | Female | DIPG        | No      | 1 (Negative)          | NA                     | NA                 | NA            | Local        | 8.3      | 23.8    | DOD          |
| 15      | 8       | Male   | A-DIPG      | Yes     | 3                     | 4                      | GBM, IV            | Biopsy        | Unknown      | NA       | NA      | LTFU         |
| 16      | 6       | Male   | A-DIPG      | Yes     | 3                     | 3                      | AA, III            | Biopsy        | L+D          | 6.8      | 8.5     | DOD          |
| 17      | 4       | Female | DIPG        | No      | 3                     | 1                      | NA                 | NA            | Local        | 10.5     | 22.0    | DOD          |
| 18      | 7       | Female | DIPG        | Yes     | 3                     | 2                      | NA                 | NA            | Local        | 5.1      | 6.7     | DOD          |
| 19      | 6       | Male   | DIPG        | No      | 3                     | 2                      | NA                 | NA            | Local        | 6.1      | 18.3    | DOD          |
| 20      | 9       | Male   | DIPG        | Yes     | 3                     | 1                      | NA                 | NA            | Local        | 12.4     | 14.9    | DOD          |
| 21      | 15      | Female | A-DIPG      | No      | 3                     | 1                      | DMG, H3 K27M       | Biopsy        | Local        | 10.6     | NA      | AWD          |
| 22      | 10      | Male   | DIPG        | No      | 3                     | 1                      | NA                 | NA            | Local        | 9.1      | NA      | AWD          |

Dx, diagnosis; +Gd, contrast enhancement; Path, pathologic; WHO, World Health Organization; PFS, progression-free survival; OS, overall survival; A-DIPG, atypical DIPG; GBM, glioblastoma; AA, anaplastic astrocytoma; HGG NOS, high-grade glioma, not otherwise specified; DA, diffuse astrocytoma; DMG, diffuse midline glioma; L+D, local and distant; DOD, died of disease; AWOD, alive without disease; LTFU, lost to follow-up; AWD, alive with disease; NA, not applicable

**SUPPLEMENTAL TABLE 4.** Change in imaging modality–defined tumor volume and 11C-MET-PET–delineated tumor maximum standardized uptake value ( $SUV_{max}$ ) over time for enrolled patients.

| Imaging Modality/<br>Sequence | N  | Baseline Scans     |           | N  | 1 <sup>st</sup> Surveillance Scans |           | Median % Volume Change |
|-------------------------------|----|--------------------|-----------|----|------------------------------------|-----------|------------------------|
|                               |    | Median Volume (mL) | IQR       |    | Median Volume (mL)                 | IQR       |                        |
| (+) 11C-MET-PET               | 18 | 6.8                | 2.2–14.4  | 15 | 17.3                               | 13.9–22.8 | (+) 157.9              |
| (+) MRI T1post                | 8  | 4.5                | 3.7–8.2   | 10 | 5.6                                | 1.8–12.3  | (+) 25.7               |
| MRI T2FLAIR                   | 22 | 33.3               | 26.2–41.0 | 17 | 19.0                               | 12.0–26.6 | (–) 42.9               |

  

| Imaging Modality | N  | Baseline Scans     |         | N  | 1 <sup>st</sup> Surveillance Scans |         | Median % $SUV_{max}$ Change |
|------------------|----|--------------------|---------|----|------------------------------------|---------|-----------------------------|
|                  |    | Median $SUV_{max}$ | IQR     |    | Median $SUV_{max}$                 | IQR     |                             |
| (+) 11C-MET-PET  | 18 | 2.0                | 1.7–2.5 | 15 | 2.7                                | 2.2–3.5 | (+) 36.3                    |

mL, milliliters; IQR, interquartile range; (+) 11C-MET-PET, uptake above that in uninvolved brain; (+) MRI T1post, T1-weighted MRI with contrast enhancement.

**Supplemental Figure 1.**

Examples of the grading scheme for intensity and uniformity of 11C-MET uptake by pediatric DIPG. (A) Intensity scale for 11C-MET uptake with co-registered MRI and 11C-MET-PET images and the respective overlay images (magenta, T2FLAIR-delineated tumor volume). Examples of grade 1 (uptake less than in normal brain tissue), grade 2 (uptake equal to that in normal brain tissue), and grade 3 (uptake greater than in normal brain tissue). \*Physiologic uptake in exocrine glands.

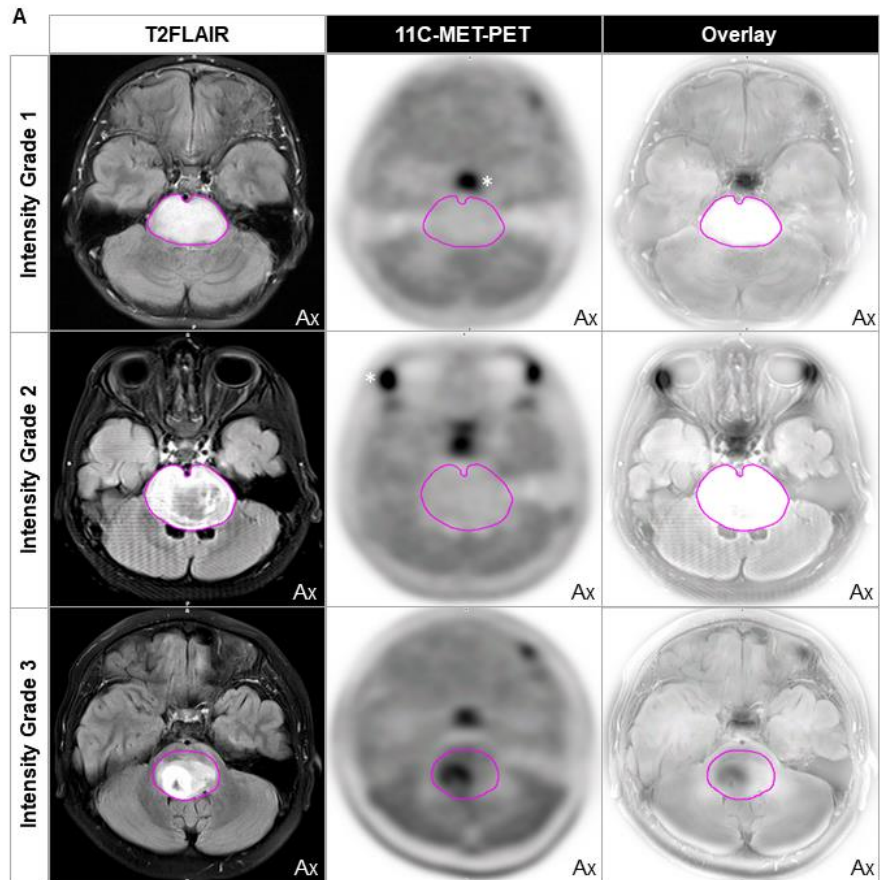

**Supplemental Figure 1 Continued.** (B) Uniformity of 11C-MET relative to co-registered MRI T2FLAIR–defined tumor volume (magenta). Examples of grade 1 (percentage of tumor demonstrating 11C-MET uptake of less than 25%), grade 2 (percentage of tumor demonstrating 11C-MET uptake of 25%–49%), grade 3 (percentage of tumor demonstrating 11C-MET uptake of 50%–74%), and grade 4 (percentage of tumor demonstrating 11C-MET uptake of 75% or greater). \*Physiologic uptake in exocrine glands.

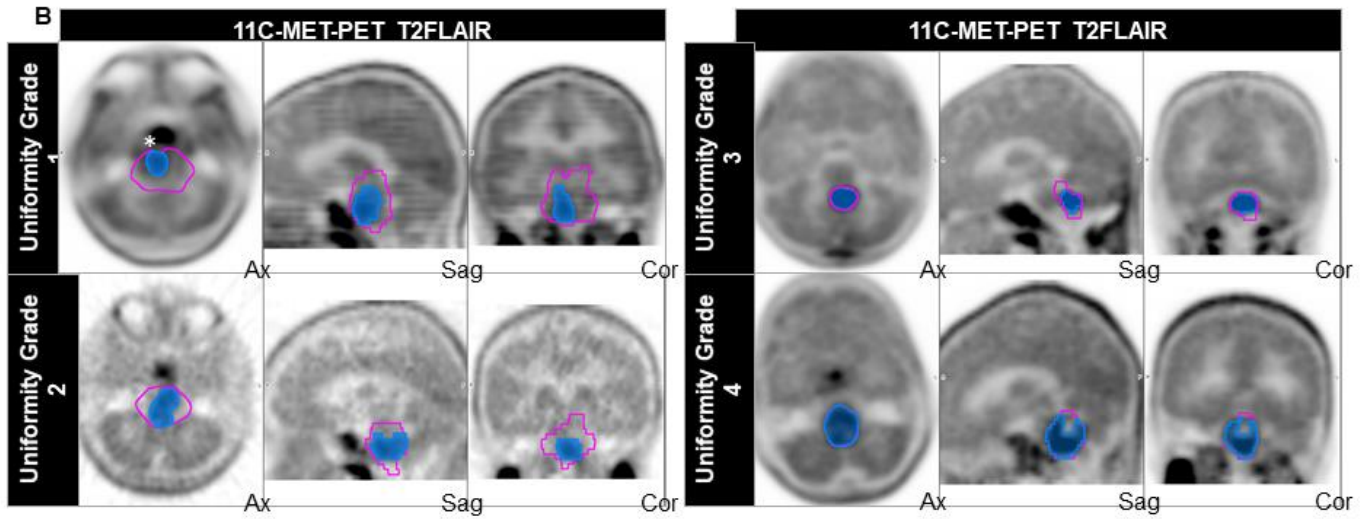

**Supplemental Figure 2.** Consort diagram of diffuse intrinsic pontine glioma (DIPG) 11C-MET-PET study.

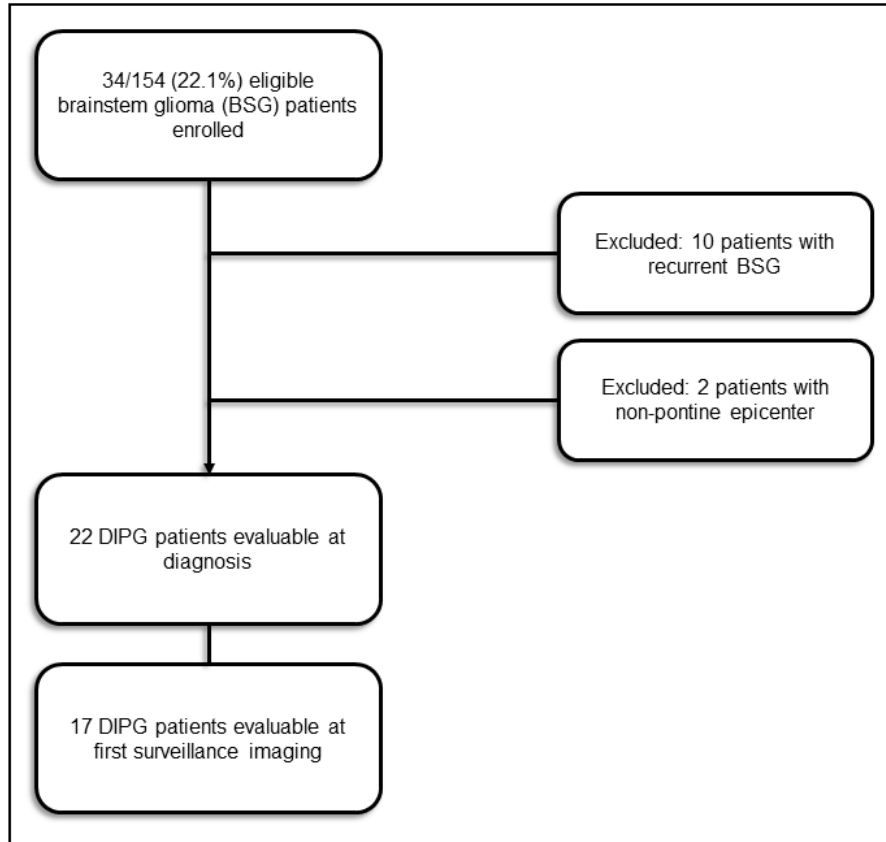

**Supplemental Figure 3.** Progression-free survival (PFS) (A) and overall survival (OS) (B) estimates for patients in this 11C-MET-PET study (blue solid line) compared to those for our institutional contemporary DIPG cohort who did not undergo 11C-MET-PET evaluation (red dashed line). OS was significantly prolonged compared to that of contemporary controls, whereas no significant differences in PFS were observed.

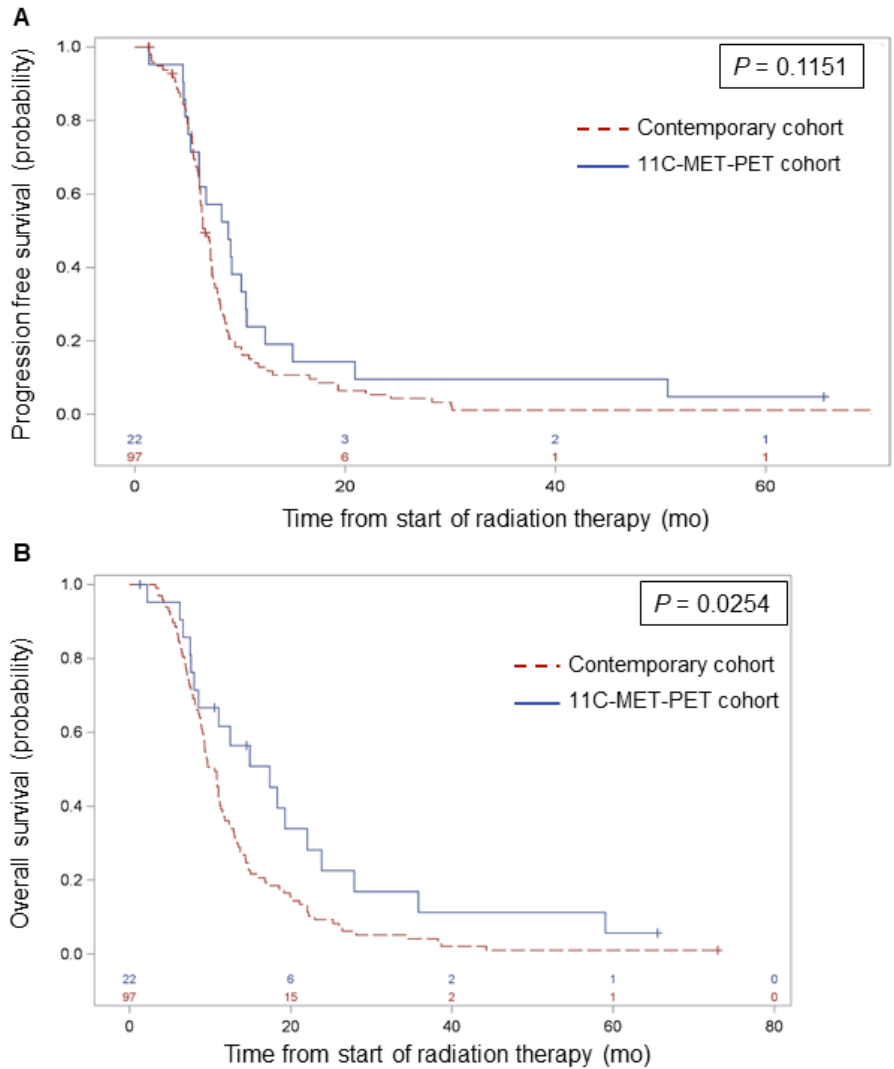



**Supplemental Figure 4:** Example of the coincidence of a recurrent DIPG and the initial 11C-MET-PET segmented tumor volume (shaded blue, bottom left) based on co-registered MRI and 11C-MET-PET-defined tumor. Shown are T2FLAIR (magenta) and T1post (red) abnormalities on MR images at progression, along with 11C-MET abnormality (yellow) on 11C-MET-PET at diagnosis. Dx, diagnosis; Rec, recurrence. \*Physiologic uptake in exocrine glands.

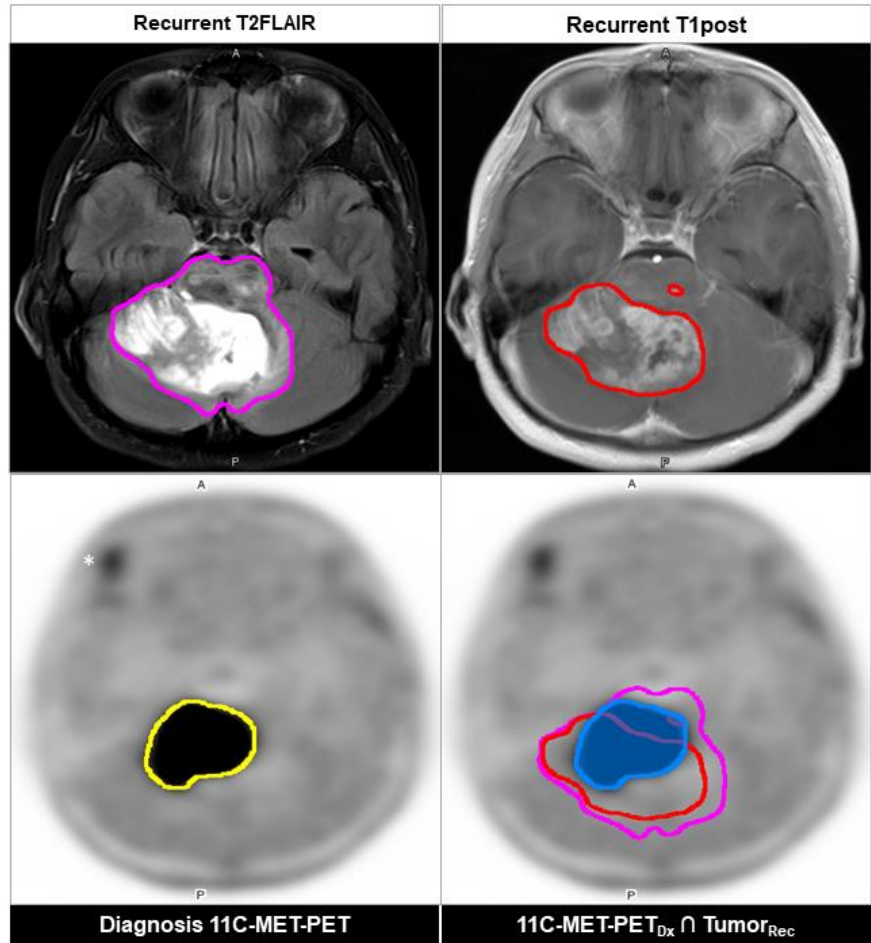

Supplement: 212514_Supplemental_Data.pdf [file 212514_Supplemental_Data.pdf]
